# Supplementary material for: Global inventory of doubly substituted isotopologues of methane (Δ 13 CH 3 D and Δ 12 CH 2 D 2 )
Source: Copernicus journal article supplement (doi:10.5194/essd-17-6889-2025), 2025-12-08
Supplement: Supplementary file [file essd-17-6889-2025-supplement-title-page.pdf › essd-17-6889-2025-supplement-title-page.pdf]

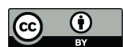

*Supplement of*

**Global inventory of doubly substituted isotopologues of methane  
( $\Delta^{13}\text{CH}_3\text{D}$  and  $\Delta^{12}\text{CH}_2\text{D}_2$ )**

**Sara M. Defratyka et al.**

*Correspondence to:* Sara M. Defratyka ([sara.defratyka@ed.ac.uk](mailto:sara.defratyka@ed.ac.uk))

- [essd-17-6889-2025-supplement-title-page.pdf](#)
- [Methane\\_Clumped\\_Isotopologues\\_Data\\_Base\\_SI.xlsx](#)

The copyright of individual parts of the supplement might differ from the article licence.
